# Supplementary material for: Tissue-resident memory T cells populate the human brain
Source: PubMed Central journal article supplement (PMC6214977; doi:10.1038/s41467-018-07053-9), 2018-11-02
Supplement: 41467_2018_7053_MOESM1_ESM.pdf [file 41467_2018_7053_MOESM1_ESM.pdf]

**Supplementary Information File**

**Tissue-resident memory T cells populate the human brain**

**Smolders et al.**

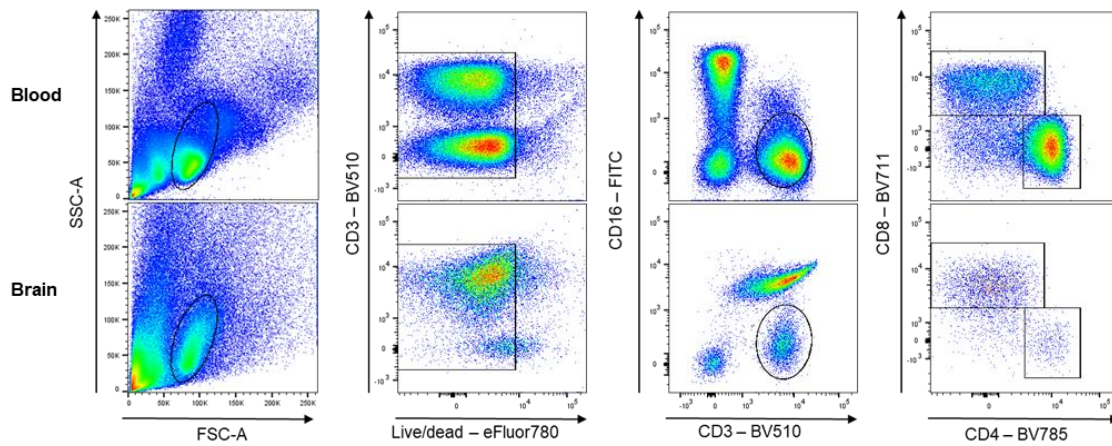

**Supplementary Figure 1. Example of CD8<sup>+</sup> and CD4<sup>+</sup> T-lymphocyte gating strategy.** Paired blood- and brain-derived cells of a donor with Parkinson's disease. Panels from left to right show subsequent within-gate events. Exclusion of duplets (SSC-H\*SSC-W and FSC-H\*FSC-W) was performed but is not shown. Note the abundant viable brain cell population in the CD3<sup>+</sup> fluorescence range, which were not T cells and were gated from the T-cell population by either including an empty channel or by including non-T-cell markers or supra-physiological expression of T-cell markers in the gating procedure (in this example, CD16). Cells and markers were back-gated to ensure no relevant cell populations were lost by this strategy.

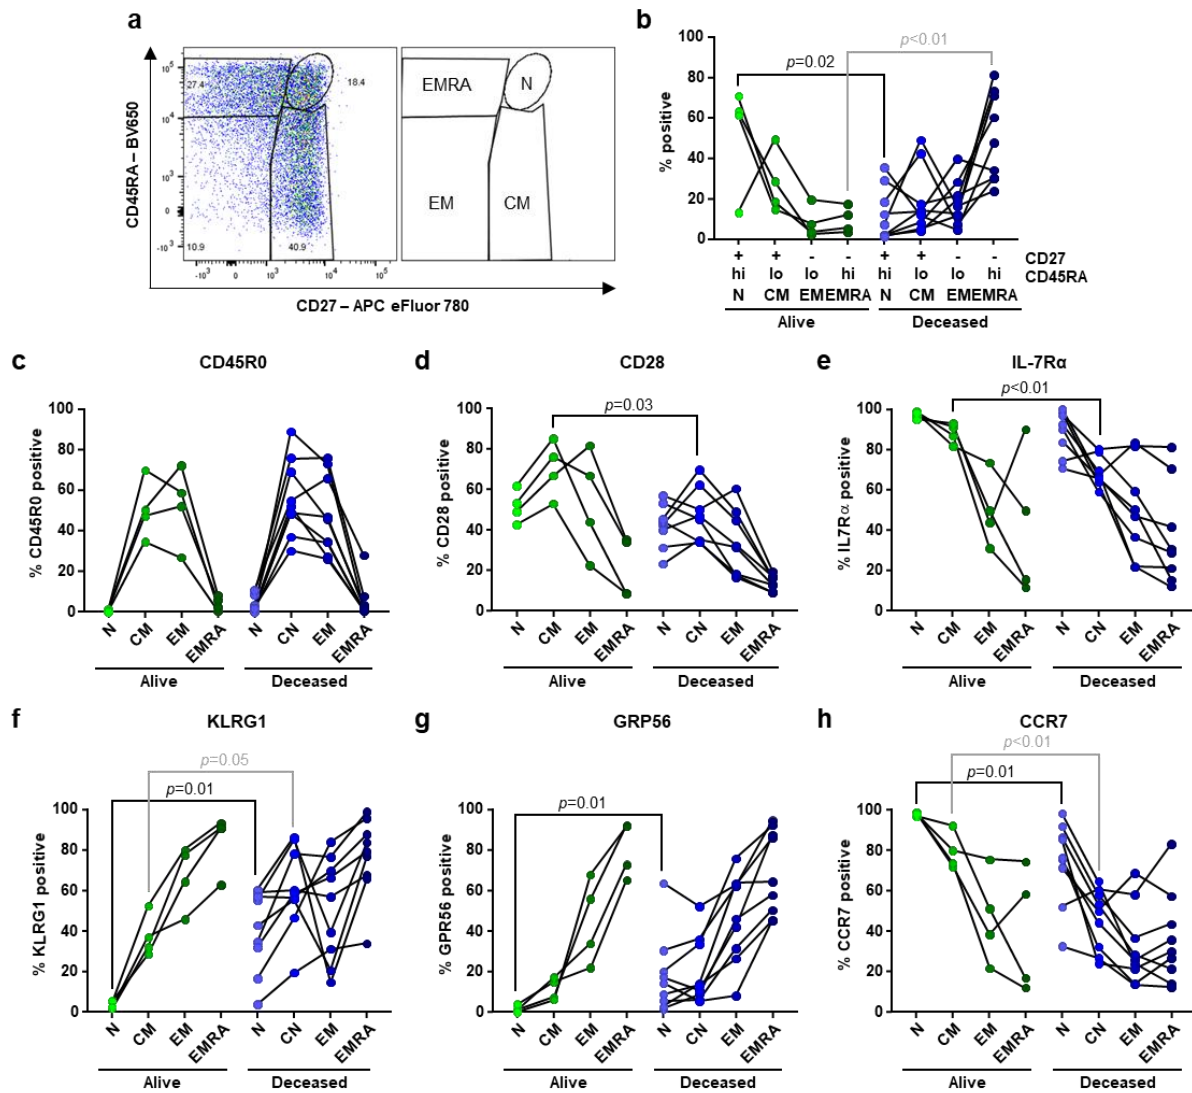

**Supplementary Figure 2. T cells from deceased donors shows a further differentiated phenotype compared to healthy controls, with a similar profile of differentiation markers.** Comparison of PBMC from  $n=4$  healthy controls with post-mortem blood of  $n=8-9$  brain donors. **(a)** Gating strategy. **(b)** Quantification of CD8<sup>+</sup> T cells with a CD27<sup>+</sup>CD45RA<sup>+</sup> (N, naive), CD27<sup>+</sup>CD45RA<sup>-</sup> (CM, central memory), CD27<sup>-</sup>CD45RA<sup>-</sup> (EM, effector memory), and CD27<sup>-</sup>CD45RA<sup>+</sup> (EMRA, CD45RA<sup>+</sup> effector memory) phenotype<sup>1</sup>. **(c-h)** Expression of CD45R0, CD28, IL-7R $\alpha$ , KLRG1, GPR56, and CCR7 stratified for CD27 and CD45RA co-expression, respectively.  $p$ -values show Mann-Whitney U test; the absence of brackets indicates the absence of a significant difference. Note the general similar profiles, although some differences exist. It is not clear whether these are due to post-mortem effects, age, (terminal) disease state, or the general higher level of antigen experience in brain donors.

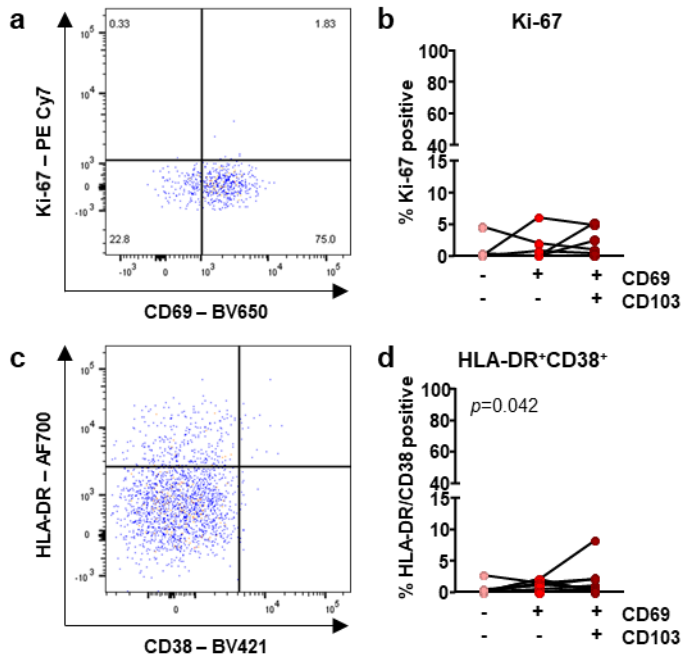

**Supplementary Figure 3. Brain CD8<sup>+</sup> T cells contain very low proportions of Ki-67<sup>+</sup> and HLA-DR<sup>+</sup>CD38<sup>+</sup> cells.** Staining of brain CD8<sup>+</sup> T cells for Ki-67 (**a**) and HLA-DR/CD38 co-expression (**c**) in a donor, with quantification (**b**) and (**d**), respectively). *p*-values show Friedman test (post-hoc Wilcoxon signed ranks showed no significant differences); no brackets indicate no significant difference. Note the substantial CD69 expression, while few cells are either Ki-67<sup>+</sup> or HLA-DR<sup>+</sup>CD38<sup>+</sup>.

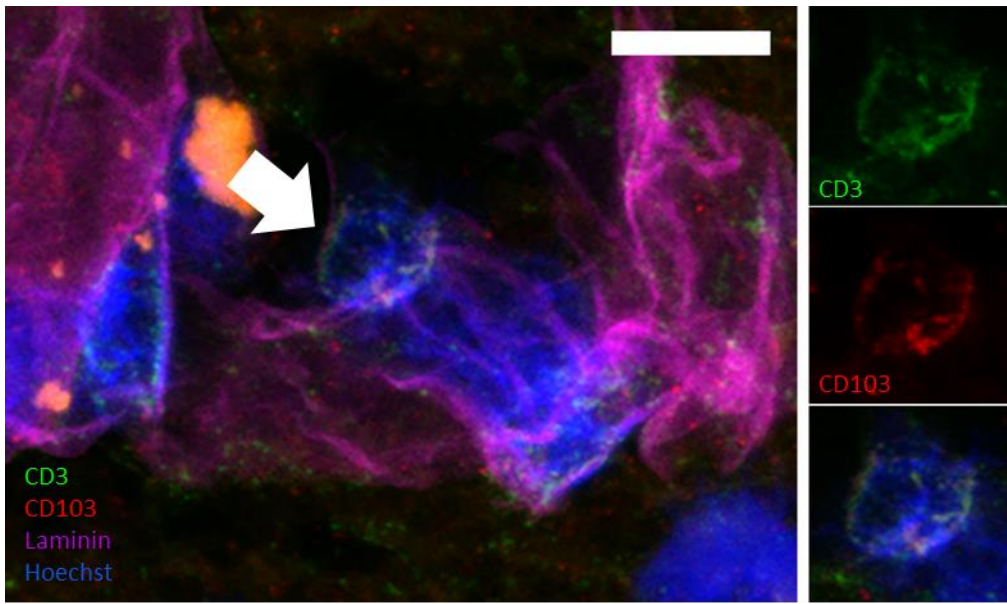

**Supplementary Figure 4. CD3 CD103 double-positive T cells reside in the perivascular space.** Triple immunofluorescent labeling for CD3 (green), CD103 (red), and laminin (magenta) with Hoechst. The arrow marks a CD3 and CD103-positive cell in close association with the perivascular space (scale bar = 10  $\mu\text{m}$ ).

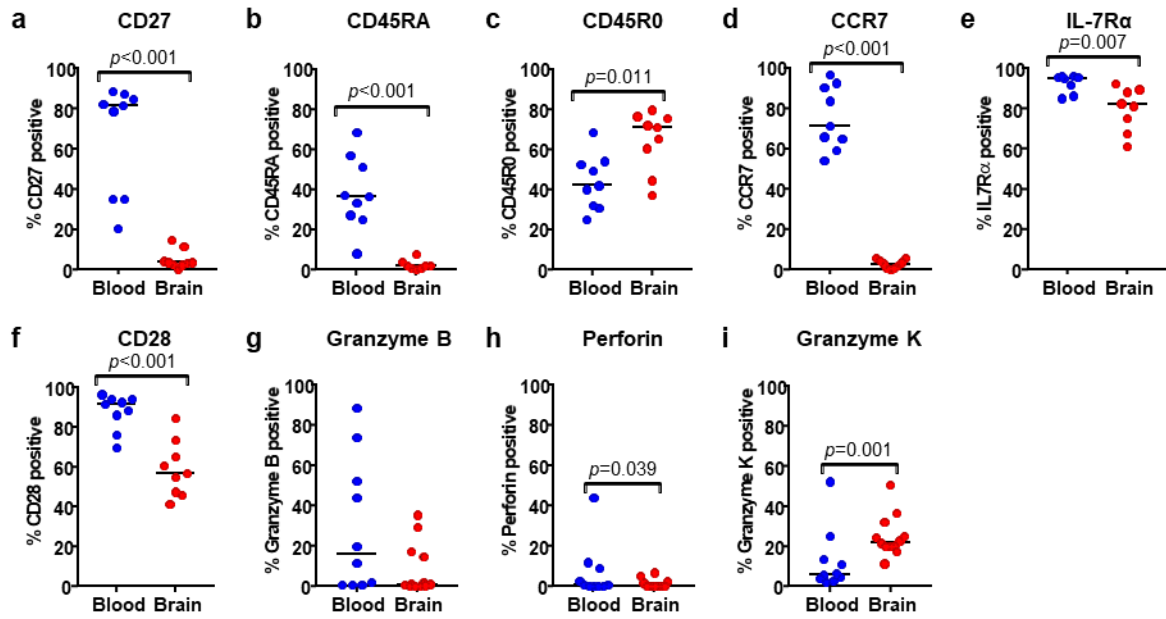

**Supplementary Figure 5. Differentiated CD4<sup>+</sup> T cells populate the human brain.** Quantification of CD27, CD45RA, CD45R0, CCR7, IL-7R $\alpha$ , CD28, granzyme B, perforin, and granzyme K expression by brain-derived CD4<sup>+</sup> T cells and peripheral blood-derived CD4<sup>+</sup> T cells. *p*-values show Mann–Whitney U test, the absence of brackets indicates no significant difference.

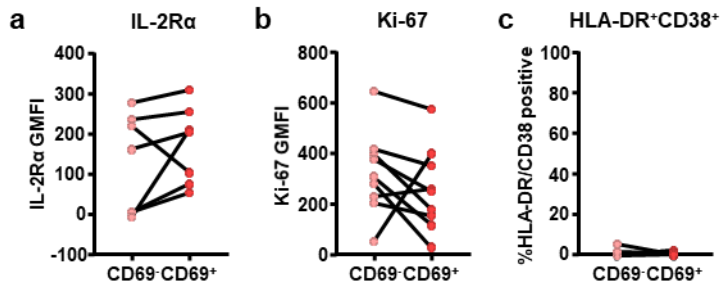

**Supplementary Figure 6. Human brain CD4<sup>+</sup> T-cell expression of activation markers IL-2R $\alpha$ , Ki-67, and HLA-DR/CD38, stratified for CD69 expression. The absence of brackets indicates the absence of a significant difference tested with the Wilcoxon signed ranks test.**

**Supplementary Table 1. Specification of antibodies used for flow cytometry**

| <b>Specificity</b>     | <b>Clone</b>       | <b>Fluorochrome</b> | <b>Manufacturer</b>                                                           |
|------------------------|--------------------|---------------------|-------------------------------------------------------------------------------|
| CD3                    | UCHT1              | V500                | BD                                                                            |
| CD3                    | 7D6                | PE Cy5.5            | eBioscience                                                                   |
| CD4                    | SK3                | BV421               | BD                                                                            |
| CD4                    | OKT4               | BV510               | Biolegend                                                                     |
| CD4                    | SK3                | APC                 | BD                                                                            |
| CD8                    | RPA-T8             | BV711               | Biolegend                                                                     |
| CD8                    | RPA-T8             | BV785               | Biolegend                                                                     |
| CD16                   | CLB-Fc-gran/1, 5D2 | FITC                | Sanquin                                                                       |
| CD25                   | BC96               | APC-eFluor780       | eBioscience                                                                   |
| CD27                   | O323               | APC-eFluor780       | eBioscience                                                                   |
| CD38                   | HIT2               | BV421               | Biolegend                                                                     |
| CD45RA                 | HI100              | BV650               | BD                                                                            |
| CD45R0                 | UCHL1              | BV785               | Biolegend                                                                     |
| CD49a/ITGA1            | TS2/7              | APC-Vio770          | Miltenyi Biotec                                                               |
| CD49D/VLA4             | 9F10               | PE-Cy7              | Biolegend                                                                     |
| CD57                   | HCD57              | PE                  | Biolegend                                                                     |
| CD69                   | FN50               | BV650               | Biolegend                                                                     |
| CD69                   | FN50               | BV421               | Biolegend                                                                     |
| CD69                   | FN50               | BV786               | BD                                                                            |
| CD103                  | Ber-Act8           | BUV395              | BD                                                                            |
| CD103                  | Ber-Act8           | PerCP-eFluor710     | eBioscience                                                                   |
| IL-7R $\alpha$ (CD127) | eBioRDR5           | PE-Cy7              | eBioscience                                                                   |
| CCR5 (CD195)           | Hek/1/85a          | AF700               | Biolegend                                                                     |
| CCR7 (CD197)           | 150503             | BUV395              | BD                                                                            |
| CXCR3 (CD183)          | G025H7             | PerCP-Cy5.5         | Biolegend                                                                     |
| CXCR6 (CD186)          | K041E5             | PE-Cy7              | Biolegend                                                                     |
| CX <sub>3</sub> CR1    | 2A9-1              | PE                  | eBioscience                                                                   |
| Eomes                  | WD1928             | AF647               | eBioscience                                                                   |
| GM-CSF                 | BVD2-21C11         | PE                  | BD                                                                            |
| GPR56                  | CG4                | PE                  | H.H. Lin, Chang Gung University, Tao-Yuan, Taiwan <sup>2</sup>                |
| Granzyme B             | GB11               | AF700               | BD                                                                            |
| HLA-DR                 | LN3                | AF700               | eBioscience                                                                   |
| Hobit <sup>A</sup>     | Hobit/1            | PE                  | K.P.J.M. van Gisbergen, Sanquin Research, Amsterdam, Netherlands <sup>3</sup> |
| IFN- $\gamma$          | 25723.11           | FITC                | BD                                                                            |
| IL-17A                 | BL-168             | BV421               | Biolegend                                                                     |
| Ki-67                  | B56                | PE-Cy7              | BD                                                                            |
| KLRG1                  | 13A2               | AF488               | H. Pircher, University of Freiburg, Germany <sup>4</sup>                      |
| Perforin               | DG9                | PerCP-eFluor710     | eBioscience                                                                   |
| T-bet                  | 4B10               | BV421               | Biolegend                                                                     |
| TNF- $\alpha$          | Mab11              | PE-cy7              | eBioscience                                                                   |

<sup>A</sup>Mouse IgM antibody detected with mouse-anti-mouse IgM-PE



## Supplementary References

1. Hamann, D. *et al.* Phenotypic and functional separation of memory and effector human CD8+ T cells. *J. Exp. Med.* **186**, 1407–18 (1997).
2. Peng, Y.-M. *et al.* Specific expression of GPR56 by human cytotoxic lymphocytes. *J. Leukoc. Biol.* **90**, 735–740 (2011).
3. Vieira Braga, F. A. *et al.* Blimp-1 homolog Hobit identifies effector-type lymphocytes in humans. *Eur. J. Immunol.* **45**, 2945–58 (2015).
4. Marcolino, I. *et al.* Frequent expression of the natural killer cell receptor KLRG1 in human cord blood T cells: correlation with replicative history. *Eur. J. Immunol.* **34**, 2672–80 (2004).
